# Supplementary material for: Crystal structure of the EndoG/EndoGI complex: mechanism of EndoG inhibition
Source: PubMed Central journal article supplement — Nucleic Acids Res. 2009 Sep 25;37(21):7312–20. doi: 10.1093/nar/gkp770 (PMC2790893; doi:10.1093/nar/gkp770), 2009-09-25
Supplement: gkp770_1.pdf [file gkp770_1.pdf]

## Supplementary Material for:

### **Crystal structure of the EndoG/EndoGI complex: Mechanism of EndoG inhibition**

Bernhard Loll<sup>a</sup>, Maike Gebhardt<sup>a</sup>, Elmar Wahle<sup>b</sup>, and Anton Meinhart<sup>a,1</sup>

<sup>a</sup>Department of Biomolecular Mechanisms, Max Planck Institute for Medical Research, Jahnstr. 29, 69120 Heidelberg, Germany.

<sup>b</sup>Institute of Biochemistry and Biotechnology, Martin-Luther-University Halle-Wittenberg, Kurt-Mothes-Strasse 3, 06120 Halle, Germany.

<sup>1</sup>To whom correspondence should be addressed:  
[Anton.Meinhart@mpimf-heidelberg.mpg.de](mailto:Anton.Meinhart@mpimf-heidelberg.mpg.de)

**Table S1.** Model completeness of the individual polypeptide chains (Ala311 is encoded from the vector backbone.)

| <b>dEndoG</b>  |        |        |        |        |
|----------------|--------|--------|--------|--------|
| chain A        | Thr67  | Ala311 |        |        |
| chain B        | Ser65  | Ala311 |        |        |
| <b>dEndoGI</b> |        |        |        |        |
| chain C / Dom1 | Ala21  | Arg174 |        |        |
| chain C / Dom2 | Leu219 | Val230 | Ile234 | Glu353 |

**Table S2.** Interaction between the dimeric dEndoG (chain A and chain B): van der Waals (vdW) interactions, hydrogen bonds (HB), and salt bridges (SB). Distances are given in Å with a distance cut-off of 2.4 Å to 3.3 Å for hydrogen bonds and salt bridges.

| chain A (dEndoG)     | chain B (dEndoG)     | distance | type |
|----------------------|----------------------|----------|------|
| Pro82O               | Arg99N $\eta$ 2      | 2.8      | HB   |
| Arg99N $\eta$ 2      | Pro82O               | 2.9      | HB   |
| Arg100N $\eta$ 2     | Asp98O $\delta$ 2    | 2.8      | SB   |
| Arg102N $\eta$ 1     | Arg287O              | 2.9      | HB   |
| Arg102N $\eta$ 2     | Arg287O              | 2.7      | HB   |
| Glu221O $\epsilon$ 2 | Lys229N $\zeta$      | 2.8      | SB   |
| Ser226O              | Val232N              | 3.0      | HB   |
| Val228O              | Tyr230N              | 2.8      | HB   |
| Lys229N $\zeta$      | Glu221O $\epsilon$ 1 | 2.7      | SB   |
| Lys229N $\zeta$      | Glu221O $\epsilon$ 2 | 3.2      | SB   |
| Tyr227               | Lys229, Glu231       |          | vdW  |
| Try230               | Val228               |          | vdW  |
| Tyr230O              | Val228N              | 2.8      | HB   |
| Val232N              | Ser226O              | 3.1      | HB   |
| Arg287N $\eta$ 1     | Phe138O              | 2.7      | HB   |
| Arg287N $\eta$ 1     | Asn236O $\delta$ 1   | 3.0      | HB   |
| Arg287N $\eta$ 2     | Asn236O $\delta$ 1   | 2.7      | HB   |
| Arg287NH2            | Ala235O              | 2.9      | HB   |
| Gly290O              | Arg99N $\epsilon$    | 3.3      | HB   |
| Leu292               | Phe139               |          | vdW  |

**Table S4.** Interaction between dEndoGI and dEndoG. Hydrogen bonds (HB), salt bridges (SB), and van der Waals (vdW) interactions between the two dEndoGI domains and the respective dEndoG molecule are listed. Distances are given in Å with a distance cut-off of 2.4 Å to 3.3 Å for hydrogen bonds and salt bridges.

| <b>dEndoGI Dom1</b><br><b>chain C</b> | <b>dEndoG</b><br><b>chain A</b> | <b>distance</b> | <b>type</b> | <b>dEndoGI Dom2</b><br><b>chain C</b> | <b>dEndoG</b><br><b>chain B</b> | <b>distance</b> | <b>type</b> |
|---------------------------------------|---------------------------------|-----------------|-------------|---------------------------------------|---------------------------------|-----------------|-------------|
| -                                     | -                               | -               | -           | Asp336Oδ1                             | Arg124Nη1                       | 3.0             | SB          |
| Leu146O                               | Arg124Nη2                       | 3.2             | HB          | Tyr331O                               | Arg124Nη2                       | 2.8             | HB          |
| Asp151Oδ2                             | Arg124Nη2                       | 2.7             | SB          | Asp336Oδ2                             | Arg124Nη2                       | 3.0             | SB          |
| Lys56Nζ                               | Asp128Oδ2                       | 2.7             | SB          | -                                     | -                               | -               | -           |
| Asp52Oδ2                              | Gln131N                         | 3.2             | HB          | -                                     | -                               | -               | -           |
| Asp52Oδ2                              | Gln131Nε2                       | 3.1             | HB          | -                                     | -                               | -               | -           |
| Val50O                                | Gln131Nε2                       | 2.9             | HB          | -                                     | -                               | -               | -           |
| Asp98Oδ1                              | Arg147Nε                        | 3.3             | HB          | -                                     | -                               | -               | -           |
| Gly97O                                | Arg147Nη2                       | 3.3             | HB          | -                                     | -                               | -               | -           |
| Asp98Oδ1                              | Arg147Nη2                       | 2.6             | SB          | -                                     | -                               | -               | -           |
| Glu94Oε2                              | Arg148Nη2                       | 3.0             | SB          | -                                     | -                               | -               | -           |
| Phe129                                | Leu146                          |                 | vdW         | Phe129                                | Tyr331                          |                 | vdW         |
| Asp145Oδ2                             | Arg153N                         | 2.8             | HB          | Asp330Oδ1                             | Arg153N                         | 2.9             | HB          |
| Asp145Oδ2                             | Arg153Nε                        | 3.1             | HB          | Asp330Oδ1                             | Arg153Nε                        | 3.1             | HB          |

|                |           |     |     |                |           |     |     |
|----------------|-----------|-----|-----|----------------|-----------|-----|-----|
| Arg147, Arg153 | Phe101    |     | vdW | Arg147, Arg153 | Phe101    |     | vdW |
| Phe101O        | Arg153Nη2 | 2.9 | HB  | Phe286O        | Arg153Nη2 | 2.8 | HB  |
| Asp145Oδ1      | Arg153Nη2 | 3.0 | SB  | Asp330Oδ2      | Arg153Nη2 | 2.9 | SB  |
| Arg142O        | Gln184Nε2 | 3.2 | HB  | -              | -         | -   | -   |
| Ser141O        | Arg188Nη2 | 2.9 | HB  | -              | -         | -   | -   |
| Arg142O        | Arg188Nη2 | 3.1 | HB  | Ala326O        | Arg188Nη2 | 3.1 | HB  |
| Ser149N        | Arg188O   | 2.9 | HB  | Asn334N        | Arg188O   | 2.9 | HB  |
| -              | -         | -   | -   | Asn334Nδ2      | Asp189Oδ1 | 3.2 | HB  |
| -              | -         | -   | -   | -              | -         | -   | -   |
| -              | -         | -   | -   | -              | -         | -   | -   |
| Asp150Oδ2      | Asn192Nδ2 | 3.1 | HB  | Asp333Oδ2      | Asn192Nδ2 | 3.3 | HB  |
| Ser149Oγ       | Asn192Nδ2 | 2.9 | HB  | -              | -         | -   | -   |
| -              | -         | -   | -   | Glu335Oε1      | Arg199Nη2 | 2.7 | SB  |

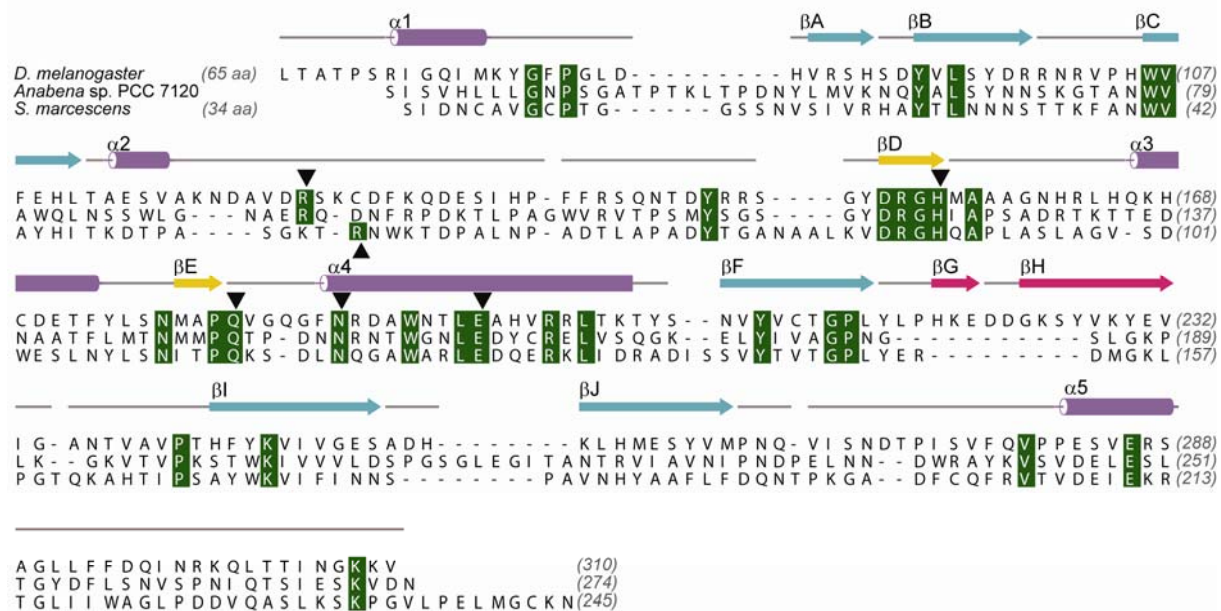

**Fig. S1.** Structure based sequence alignment of EndoG from *D. melanogaster* (NP\_609781), NucA from *Anabena* sp. PCC 7120 (YP\_227663) and endonuclease from *Serratia marcescens* (P\_13717). Identical residues are colored dark green. Secondary structure elements are colored according to Secondary structure elements are shown above the amino acid sequences with  $\alpha$ -helices as brown cylinders. The small two-stranded  $\beta$ -sheet ( $\beta$ -strands D and E) involved in metal ion binding is highlighted in yellow. The two wings forming an intermolecular  $\beta$ -sheet are shown in red ( $\beta$ -strands G and H). Residues of dEndoG directly involved in catalysis are marked with black triangles above the amino acid sequence. The guanidinium function of Arg57 of the *Serratia* nuclease (black triangle below the sequence) and Arg124 in dEndoG occupy the same position even though the trace of the polypeptide main chain differs within both structures.

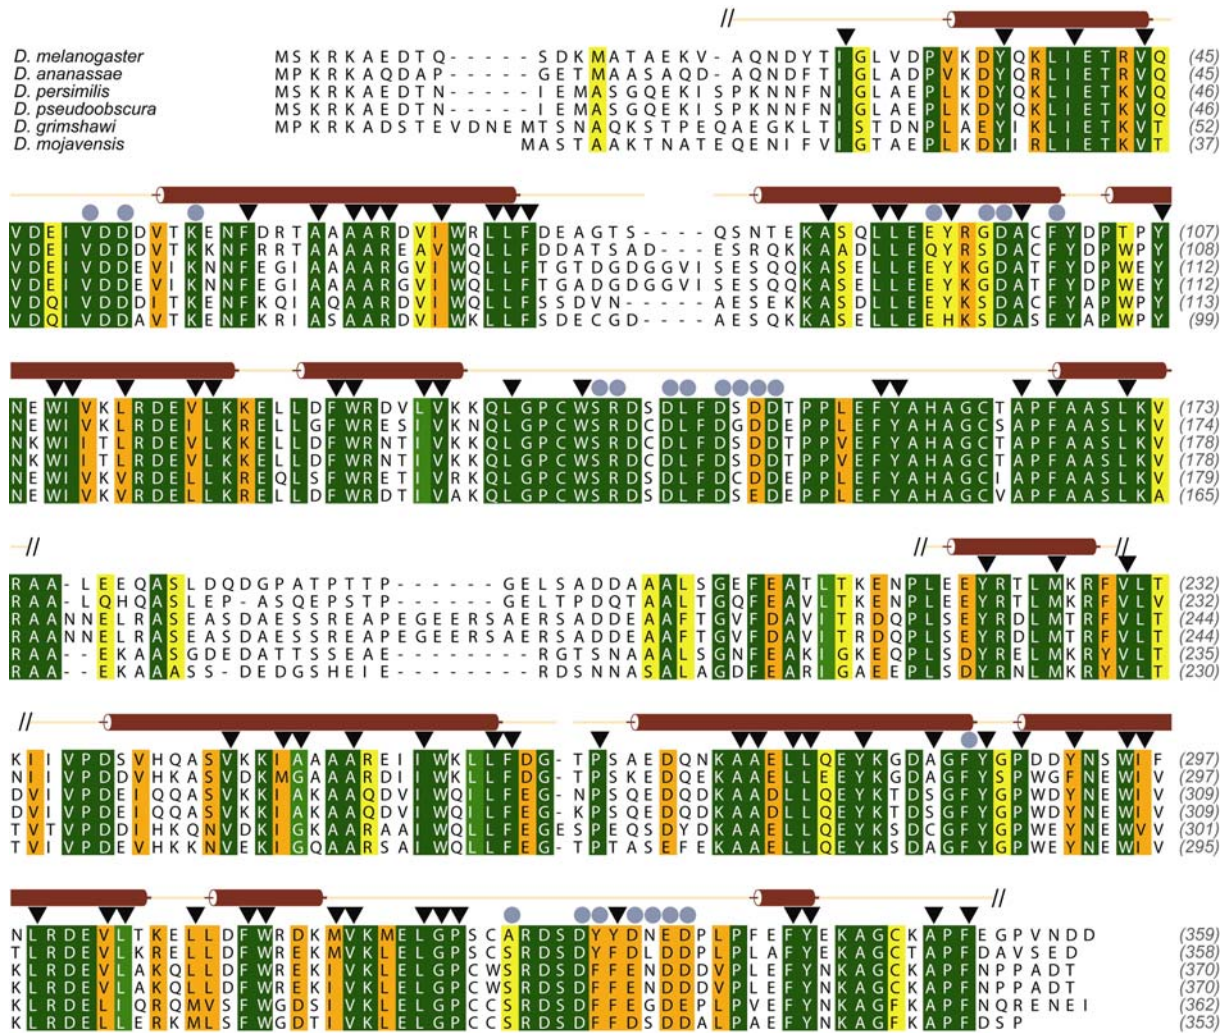

**Fig. S2.** Sequence alignment of dEndoGI with other *Drosophila* species for *D. melongaster* (NP\_609781), *D. ananassae* (XP\_1961417), *D. persimilis* (NP\_2018773), *D. pseudoobscura* (XP\_1357384), *D. grimshawi* (XP\_1992859), and *D. mojavensis* (XP\_2002941). Identical residues are colored dark green and according to the decreasing similarity from light green through orange to yellow. Secondary structures are shown above the primary sequences with  $\alpha$ -helices as brown cylinders. Residues which are involved in hydrogen bonds, salt bridges or hydrophobic interaction in the dEndoG/dEndoGI interface are labeled with grey circles. The black triangles indicate residues which establish the hydrophobic core of Dom1 and Dom2 of dEndoGI.

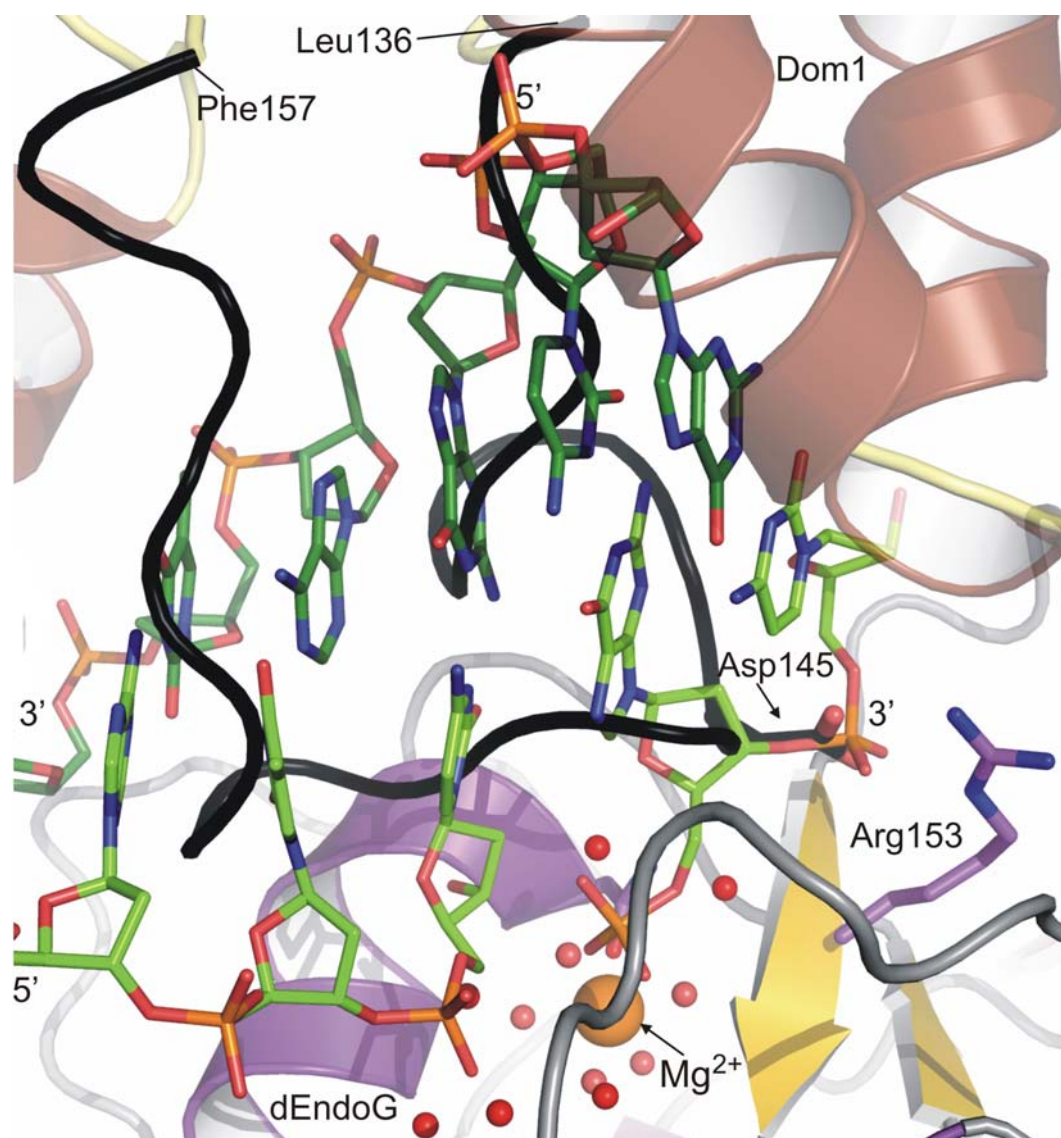

**Fig. S3.** Superposition of dEndoG/dEndoGI with Vnn endonuclease bound to DNA. A superposition of dEndoG (residues 151-162 and 178-188) with the structure of the Vnn endonuclease (residues 76-87 and 119-129) in complex with a cleaved DNA oligonucleotide (PDB code 1oup); The DNA strand is drawn in light green (sense) and dark green (antisense). Helices of dEndoG are illustrated as purple ribbons and strands of the central  $\beta$ -sheet in cyan. The small two-stranded  $\beta$ -sheet ( $\beta$ -strands D and E) involved in metal ion binding is highlighted in yellow, and the bound metal ion is shown as an orange sphere. The black colored loop region (residues 136-157) illustrates the mimicry of the DNA oligonucleotide phosphate backbone by dEndoGI/Dom1. The negative charged carboxyl group of Asp145 of Dom1 (black sticks) occupies similar position as a phosphate moiety of the DNA and forms in the dEndoG/dEndoGI complex a salt bridge to Arg153 (side chains are shown as stick model).
